# Supplementary material
Source: publisher site journal article supplement (https://www.spandidos-publications.com/1648/downloadSupplementary)
Supplement: Supplementary file 1 [file downloadSupplementary]

## Sheet: Sheet1
Table SIII. Predictive performance of the training set and test set.
Performance	Training set		Test set
	SIL	Healthy control	SIL	Healthy control
Positive prediction, n	60	1	40	0
Negative prediction, n	1	38	1	26
Total, n	61	39	41	26
Sensitivity, %	98		98
Specificity, %	97		100
Accuracy, %	98		99
ROC AUC	99		100
SIL, squamous intraepithelial lesion; ROC, receiver operating characteristic; AUC, area under the curve.
